# Supplementary material
Source: HighWire-hosted journal article supplement (https://bmjopen.bmj.com/content/12/11/e066959)
Supplement: inline-supplementary-material-1 [file inline-supplementary-material-1.pdf]

## Appendix 1: Outcome variable to be extracted from experimental studies

| <b>Temporospatial</b>                 | <b>Kinematics</b>                                      |                                                        | <b>Kinetics</b>                              |      |
|---------------------------------------|--------------------------------------------------------|--------------------------------------------------------|----------------------------------------------|------|
| BMI                                   | Knee adduction range of motion (ROM)                   | Knee                                                   | Peak knee adduction moment (KAM)             | Knee |
| Walking speed                         | Knee sagittal ROM                                      |                                                        | KAM loading rate (rate of force development) |      |
| Stride width (from midline)           | Hip-knee-ankle adduction angle                         |                                                        | KAM impulse                                  |      |
| Stride/step length/symmetry           | Varus/valgus angle - knee adduction angle              |                                                        | Peak knee joint contact forces               |      |
| Stance/contact time                   | Knee flexion at heel strike                            |                                                        | Joint reaction force at terminal stance      |      |
| Leg length discrepancy                | Knee flexion at toe off                                | Peak knee sagittal/flexion/extension plane moments     |                                              |      |
| Cadence                               |                                                        | Knee rotation moment early stance                      |                                              |      |
|                                       |                                                        | Knee flexion moment at loading response                |                                              |      |
| <b>Ground Reaction Force (GRF)</b>    | Peak hip extension                                     | Flexion moment at terminal stance                      |                                              |      |
| Vertical GRF at heel strike           | Peak hip flexion angle                                 | Net work                                               |                                              |      |
| Horizontal GRF at heel strike         | Hip flexion at toe off                                 | Positive work                                          |                                              |      |
| Vertical GRF loading rate             | Hip ROM sagittal                                       | Negative work                                          | Knee                                         |      |
| Prosthetic horizontal GRF at push-off | Hip flexion at loading response                        |                                                        |                                              |      |
| Peak vertical GRF                     |                                                        | Peak hip extension moment                              | Hip                                          |      |
|                                       | Peak trunk flexion angle                               |                                                        |                                              |      |
|                                       | Peak lumbar spine extension                            | Lumbar-pelvic lateral joint reaction force             | Trunk/Pelvis                                 |      |
|                                       | Lumbar-pelvis spine extension                          | Anterior lateral joint reaction force - lumbar-pelvic  |                                              |      |
|                                       | Peak coronal/frontal/lateral/contralateral pelvic tilt | Mediolateral shear joint reaction force of trunk       |                                              |      |
|                                       | Peak anterior-posterior/sagittal pelvic tilt           | Anterior-posterior shear joint reaction force of trunk |                                              |      |
|                                       | Pelvic ROM in frontal plane                            | Compression joint reaction force forces of trunk       |                                              |      |
|                                       | Pelvic ROM in sagittal plane                           | Lumbar/pelvic joint power                              |                                              |      |
|                                       | Lumbar transverse plane rotation ROM                   | Lower back joint contact force                         |                                              |      |
|                                       | Sagittal plane pelvis angle                            | Joint work L5/S1 (frontal and sagittal plane)          |                                              |      |
|                                       | Side flexion of trunk-pelvis                           |                                                        |                                              |      |
|                                       | Mediolateral trunk sway                                |                                                        |                                              |      |
|                                       | Lumbar lordosis angle                                  |                                                        |                                              |      |
|                                       |                                                        | Trunk/Pelvis                                           |                                              |      |
